# Supplementary material for: Microglia induce neurogenic protein expression in primary cortical cells by stimulating PI3K/AKT intracellular signaling in vitro
Source: PubMed Central journal article supplement (PMC7884585; doi:10.1007/s11033-020-06092-0), 2021-01-02

NESTIN 176 kDa

1. 2. 3. 4. L

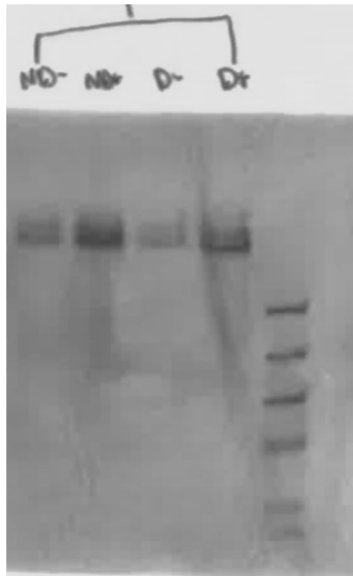

$\alpha$ -Internexin 66 kDa

1. 2. 3. 4. L

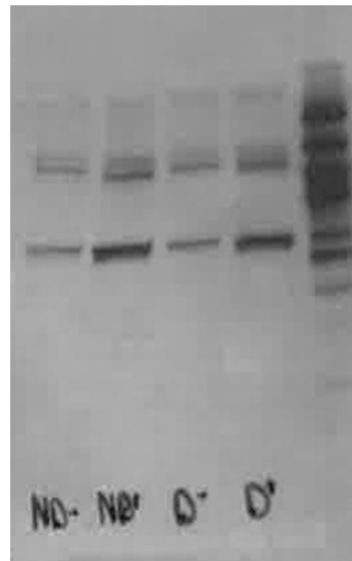

NeuN 48 kDa

BM 1. 2. 3. 4.

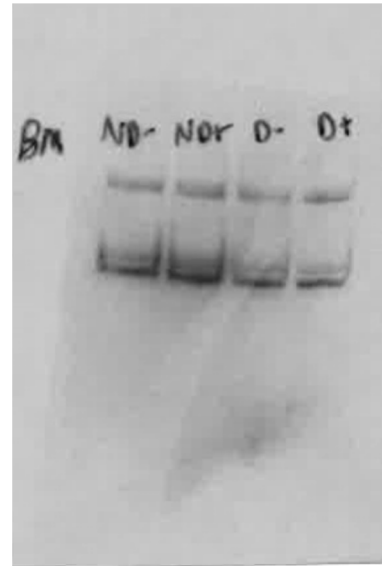

GFAP 55 kDa

1. 2. 3. 4. L

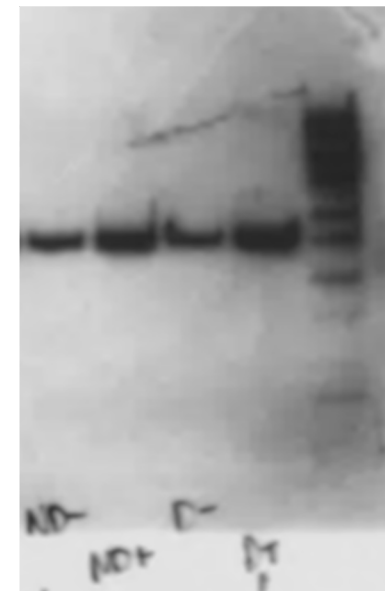

GAPDH 37 kDa

L 1. 2. 3. 4.

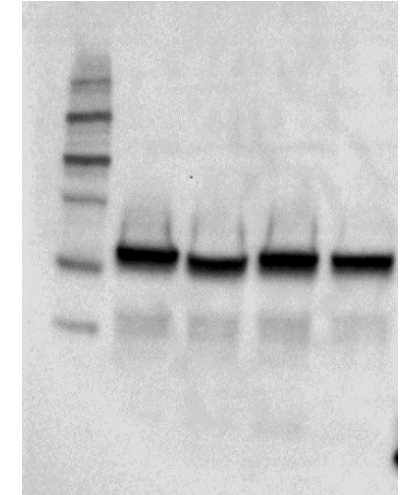

Supplement: 11033_2020_6092_MOESM1_ESM.pdf [file 11033_2020_6092_MOESM1_ESM.pdf]
