# Supplementary material for: Microglia induce neurogenic protein expression in primary cortical cells by stimulating PI3K/AKT intracellular signaling in vitro
Source: PubMed Central journal article supplement (PMC7884585; doi:10.1007/s11033-020-06092-0), 2021-01-02

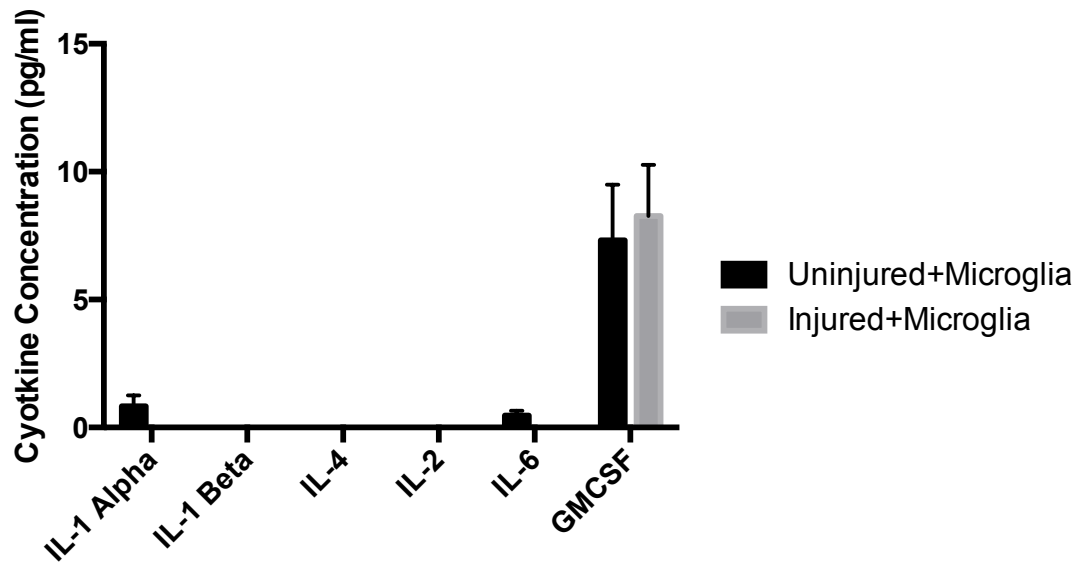

Supplement: 11033_2020_6092_MOESM2_ESM.pdf [file 11033_2020_6092_MOESM2_ESM.pdf]
